# Supplementary material for: Fabrication of a Cd(ii) metal–organic framework as a dual functional material: efficient iodine capture and selective adsorption of a cationic dye
Source: Royal Society of Chemistry journal article supplement (doi:10.1039/d3ce00048f), 2023-01-01
Supplement: d3ce00048f1.pdf [file d3ce00048f1.pdf]

## Electronic Supporting Information (ESI)

### Fabrication of Cd(II) metal-organic framework as a dual functional material: Efficient iodine capture and selective adsorption of cationic dye

Farhat Vakil<sup>a</sup>, M. Shahwaz Ahmad<sup>a</sup>, Manjeet Kumar<sup>b</sup>, Azaj Ansari<sup>b</sup>, M. Shahid<sup>a\*</sup>, Musheer Ahmad<sup>c</sup>

<sup>a</sup>Functional Inorganic Materials Lab (FIML), Department of Chemistry, Aligarh Muslim University, Aligarh-202002, India.

<sup>b</sup>Department of Chemistry Central University of Haryana, India.

<sup>c</sup>Department of Applied Chemistry (ZHCET) Aligarh Muslim University, Aligarh-202002, India.

\*Corresponding author: shahid81chem@gmail.com

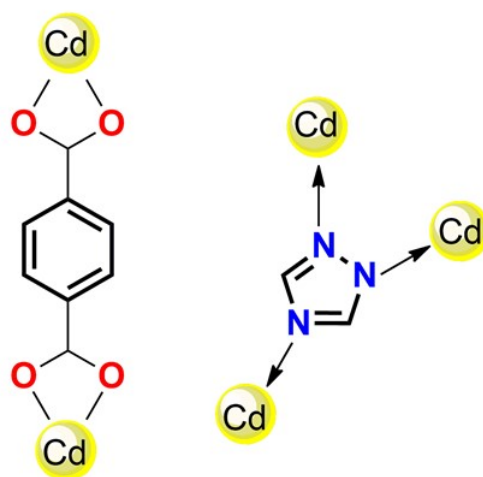

**Fig. S1.** The different coordination mode of H<sub>2</sub>tpa and tz<sup>-</sup> ligands are depicted.

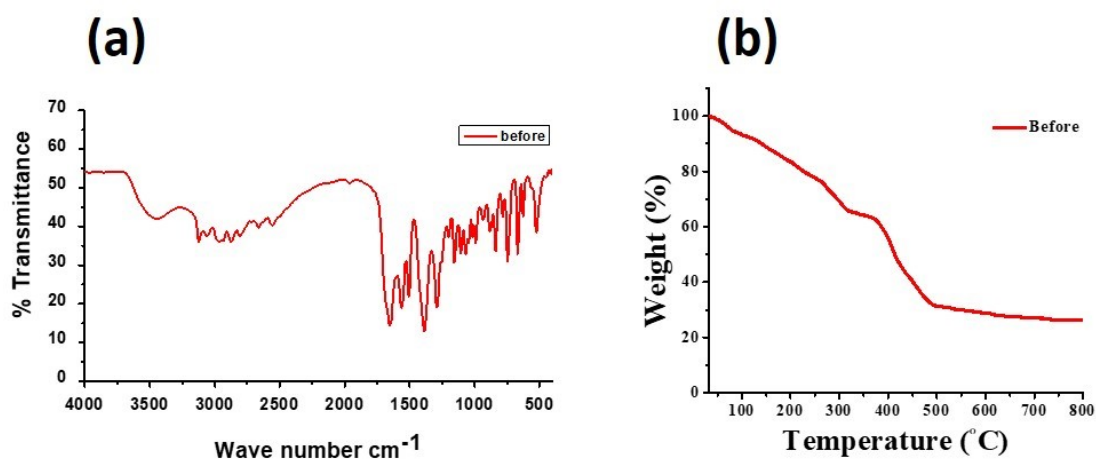

Fig. S2. (a) FTIR spectrum and (b) TGA before iodine adsorption.

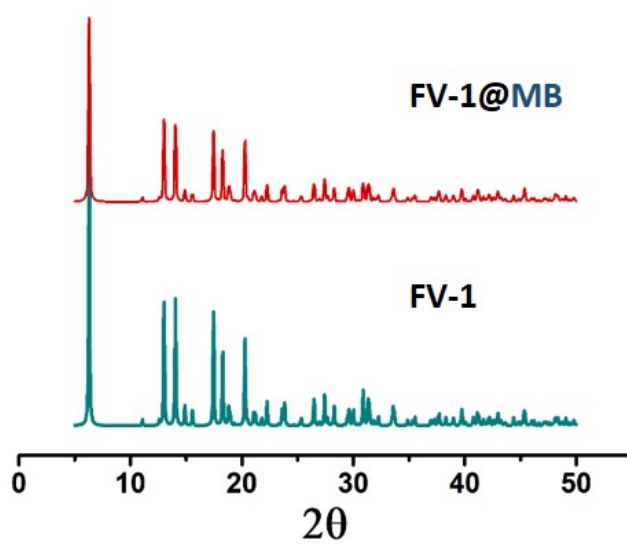

Fig. S3. PXRD pattern of FV-1 before and after adsorption of MB.

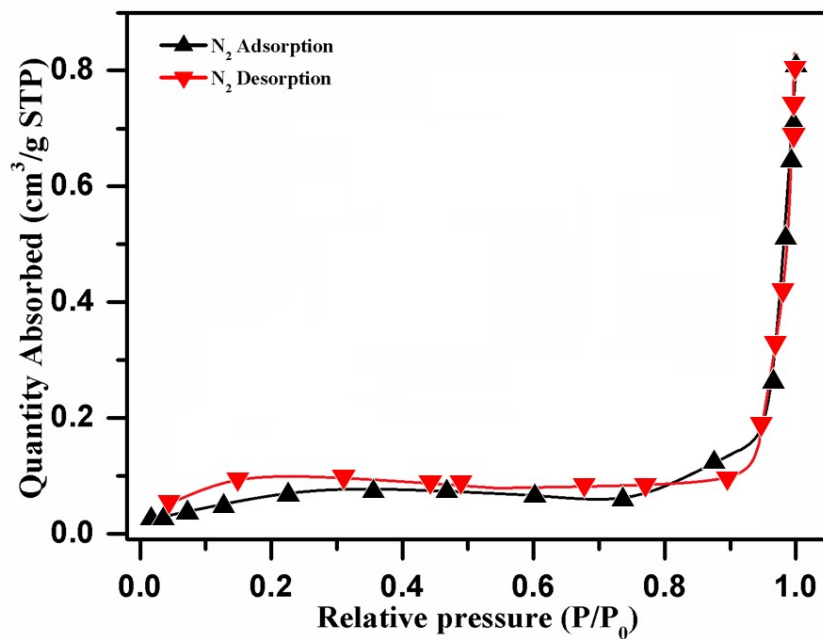

Fig. S4. N<sub>2</sub> adsorption/desorption isotherm for FV-1 showing no noticeable porosity.

**Table S1.** Bond Lengths for **FV-1**.

| <b>Atom</b> | <b>Atom</b>     | <b>Length/Å</b> |
|-------------|-----------------|-----------------|
| Cd1         | O1              | 2.314 (2)       |
| Cd1         | O2              | 2.433 (2)       |
| Cd1         | O3              | 2.401 (2)       |
| Cd1         | N1              | 2.244 (2)       |
| Cd1         | N2 <sup>1</sup> | 2.318 (2)       |
| Cd1         | N3 <sup>2</sup> | 2.256 (2)       |
| O1          | C3              | 1.249 (5)       |
| O2          | C3              | 1.240 (4)       |
| O3          | C7              | 1.189 (5)       |
| N1          | N2              | 1.365 (3)       |
| N1          | C1              | 1.314 (3)       |
| N2          | C2              | 1.314 (4)       |
| N3          | C1              | 1.326 (3)       |
| N3          | C2              | 1.334 (4)       |
| N4          | C7              | 1.288 (6)       |
| N4          | C8              | 1.400 (8)       |
| N4          | C9              | 1.434 (10)      |
| C3          | C4              | 1.517 (4)       |
| C4          | C5              | 1.359 (6)       |
| C4          | C6              | 1.363 (5)       |
| C5          | C6 <sup>3</sup> | 1.392 (5)       |

**Table S2.** Bond Angles for **FV-1**.

| <b>Atom</b>     | <b>Atom</b> | <b>Atom</b>      | <b>Angle/°</b> |
|-----------------|-------------|------------------|----------------|
| O2              | Cd1         | O1               | 54.91 (9)      |
| O3              | Cd1         | O1               | 86.59 (10)     |
| O3              | Cd1         | O2               | 88.94 (9)      |
| N1              | Cd1         | O1               | 108.16 (10)    |
| N1              | Cd1         | O2               | 162.05 (9)     |
| N1              | Cd1         | O3               | 83.67 (9)      |
| N2 <sup>1</sup> | Cd1         | O1               | 95.34 (9)      |
| N2 <sup>1</sup> | Cd1         | O2               | 89.14 (8)      |
| N2 <sup>1</sup> | Cd1         | O3               | 175.82 (10)    |
| N2 <sup>1</sup> | Cd1         | N1               | 99.22 (8)      |
| N3 <sup>2</sup> | Cd1         | O1               | 146.17 (9)     |
| N3 <sup>2</sup> | Cd1         | O2               | 92.14 (9)      |
| N3 <sup>2</sup> | Cd1         | O3               | 85.19 (10)     |
| N3 <sup>2</sup> | Cd1         | N1               | 103.46 (9)     |
| N3 <sup>2</sup> | Cd1         | N2 <sup>1</sup>  | 91.17 (9)      |
| C3              | Cd1         | O1               | 27.55 (11)     |
| C1              | N1          | Cd1              | 127.41 (18)    |
| C1              | N1          | N2               | 105.7 (2)      |
| N1              | N2          | Cd1 <sup>1</sup> | 133.62 (17)    |
| C2              | N2          | Cd1 <sup>1</sup> | 120.90 (18)    |
| C2              | N2          | N1               | 105.3 (2)      |
| C1              | N3          | Cd1 <sup>3</sup> | 128.79 (19)    |
| C2              | N3          | Cd1 <sup>3</sup> | 129.24 (19)    |
| C2              | N3          | C1               | 101.9 (2)      |
| C8              | N4          | C7               | 121.9 (6)      |
| C9              | N4          | C8               | 117.3 (7)      |
| N3              | C1          | N1               | 113.6 (2)      |
| N3              | C2          | N2               | 113.5 (2)      |
| O1              | C3          | Cd1              | 58.98 (16)     |
| O2              | C3          | Cd1              | 64.46 (16)     |
| O2              | C3          | O1               | 123.4 (3)      |
| C3              | Cd1         | O2               | 27.37 (10)     |
| C3              | Cd1         | O3               | 87.31 (10)     |
| C3              | O1          | Cd1              | 93.5 (2)       |
| C3              | O2          | Cd1              | 88.2 (2)       |
| C7              | O3          | Cd1              | 126.5 (3)      |
| N2              | N1          | Cd1              | 126.74 (17)    |
| C4              | C3          | Cd1              | 177.0 (3)      |
| C4              | C3          | O1               | 118.1 (3)      |
| C4              | C3          | O2               | 118.5 (3)      |
| C5              | C4          | C3               | 120.8 (3)      |
| C6              | C4          | C3               | 120.4 (3)      |
| C6              | C4          | C5               | 118.8 (3)      |
| C6 <sup>4</sup> | C5          | C4               | 120.5 (4)      |
| C5 <sup>4</sup> | C6          | C4               | 120.7 (4)      |

### Explanation of Alert B in the Checkcif:

```
# start Validation Reply Form
_vrf_PLAT230_ALERT_2_B
;
PROBLEM:Hirshfeld Test Diff for O3 --C7 8.5 s.u.
RESPONSE:Due to unresolved disorders, some atoms were still not ideally shaped,
however, this does not indicate an incorrect atom-type assignment.
;
_vrf_PLAT232_ALERT_2_B
;
PROBLEM:Hirshfeld Test Diff (M-X) Cd1 --O2 13.9 s.u.
RESPONSE:Due to unresolved disorders, some atoms were still not ideally shaped,
however, this does not indicate an incorrect atom-type assignment.
;
_vrf_PLAT242_ALERT_2_B
;
PROBLEM:Low 'MainMol' Ueq as Compared to Neighbors of N4 Check
RESPONSE:This may be also due to disorders in the atoms, but the atom-type
assignment is correct.
# end Validation Reply Form
```

**Table S3.** Determination of zeta potential at varying pH for **FV-1**.

| pH | Zeta Potential (mV) |
|----|---------------------|
| 2  | -4.06               |
| 3  | -4.10               |
| 4  | -4.11               |
| 5  | -4.19               |
| 6  | -4.21               |
| 7  | -5.61               |
| 8  | 0.00                |
| 9  | +0.56               |
| 10 | +0.55               |
| 11 | +0.54               |
| 12 | +0.60               |
